# Supplementary material for: Factors affecting prolonged time to extubation in patients given remimazolam
Source: PubMed Central journal article supplement (PMC9116664; doi:10.1371/journal.pone.0268568), 2022-05-18
Supplement: pone.0268568.s001.pdf [file pone.0268568.s001.pdf]

| Patient No. | Sex | Age | Height | Body weight | BMI      | Plasma albumin | ASA class |
|-------------|-----|-----|--------|-------------|----------|----------------|-----------|
| 1           | M   | 44  | 174.5  | 76.7        | 25.18863 | 4.8            | 1         |
| 2           | M   | 77  | 163    | 49.6        | 18.66837 | 3              | 2         |
| 3           | F   | 70  | 151.5  | 41.1        | 17.90674 | 4.3            | 3         |
| 4           | F   | 55  | 158.8  | 72.8        | 28.86891 | 4.5            | 2         |
| 5           | F   | 26  | 169.2  | 64.3        | 22.46003 | 4              | 2         |
| 6           | M   | 61  | 174    | 93.6        | 30.91558 | 4.4            | 2         |
| 7           | M   | 73  | 155    | 48.5        | 20.1873  | 3.5            | 2         |
| 8           | F   | 72  | 152.5  | 54.9        | 23.60656 | 4.4            | 1         |
| 9           | F   | 57  | 151.7  | 49.6        | 21.55314 | 4.4            | 2         |
| 10          | F   | 48  | 145    | 40          | 19.02497 | 4.3            | 1         |
| 11          | M   | 72  | 166    | 56.6        | 20.53999 | 3.6            | 3         |
| 12          | M   | 82  | 153.1  | 47          | 20.05153 | 3              | 3         |
| 13          | F   | 44  | 159.4  | 48          | 18.89142 | 4.1            | 2         |
| 14          | F   | 69  | 148    | 56.4        | 25.74872 | 3.2            | 2         |
| 15          | M   | 24  | 169    | 58          | 20.30741 | 4.4            | 1         |
| 16          | M   | 79  | 165.3  | 62.6        | 22.91019 | 2.8            | 2         |
| 17          | F   | 86  | 155.7  | 63.4        | 26.15243 | 2.5            | 2         |
| 18          | F   | 68  | 151.5  | 45.6        | 19.86733 | 4              | 2         |
| 19          | M   | 58  | 161.9  | 65          | 24.79817 | 4.3            | 2         |
| 20          | F   | 75  | 144.2  | 45.5        | 21.88169 | 3.2            | 2         |
| 21          | M   | 57  | 170.4  | 67.5        | 23.24688 | 4.6            | 2         |
| 22          | M   | 78  | 165    | 61          | 22.40588 | 3.7            | 2         |
| 23          | M   | 72  | 153.3  | 49.8        | 21.19069 | 4.6            | 2         |
| 24          | M   | 87  | 158.7  | 67.3        | 26.72152 | 2.4            | 2         |
| 25          | F   | 92  | 150    | 39.2        | 17.42222 | 2.4            | 3         |
| 26          | M   | 58  | 170.4  | 61.4        | 21.14605 | 3.8            | 2         |
| 27          | M   | 60  | 163.8  | 86.4        | 32.20223 | 4.1            | 2         |
| 28          | M   | 80  | 157    | 83          | 33.67277 | 2.8            | 3         |
| 29          | F   | 84  | 143.7  | 43.5        | 21.06569 | 3.5            | 3         |
| 30          | M   | 33  | 173    | 54.4        | 18.17635 | 4.3            | 1         |
| 31          | F   | 87  | 146.5  | 52.8        | 24.60133 | 3.5            | 3         |
| 32          | F   | 67  | 155.8  | 59.3        | 24.42979 | 3.7            | 2         |
| 33          | F   | 51  | 163.5  | 82.3        | 30.78678 | 4.2            | 2         |
| 34          | M   | 73  | 167.5  | 64.1        | 22.84696 | 4.1            | 2         |
| 35          | F   | 53  | 162    | 68          | 25.91068 | 3.6            | 3         |
| 36          | M   | 81  | 157    | 56.7        | 23.00296 | 2.9            | 3         |

|      |    |       |       |          |     |   |
|------|----|-------|-------|----------|-----|---|
| 37 F | 81 | 140   | 50    | 25.5102  | 2.2 | 3 |
| 38 M | 43 | 176.4 | 90.3  | 29.01954 | 3.6 | 3 |
| 39 M | 82 | 156.5 | 64.1  | 26.17154 | 3.6 | 2 |
| 40 F | 88 | 150   | 57.9  | 25.73333 | 2.9 | 2 |
| 41 M | 87 | 152   | 56.7  | 24.5412  | 3.3 | 3 |
| 42 M | 59 | 177   | 80.8  | 25.7908  | 3.5 | 2 |
| 43 M | 72 | 169.5 | 84.7  | 29.48112 | 3.2 | 2 |
| 44 F | 55 | 159.5 | 107.7 | 42.33449 | 4.4 | 2 |
| 45 F | 90 | 138   | 42.3  | 22.21172 | 2.8 | 3 |
| 46 F | 61 | 155.6 | 60.7  | 25.07088 | 3.9 | 1 |
| 47 M | 79 | 165.5 | 75.5  | 27.56455 | 2.8 | 2 |
| 48 F | 76 | 153.2 | 72.4  | 30.84758 | 3.2 | 2 |
| 49 F | 75 | 155   | 46.4  | 19.31322 | 2.7 | 3 |
| 50 M | 70 | 174   | 94    | 31.04769 | 3.2 | 2 |
| 51 M | 16 | 159   | 60    | 23.73324 | 4.5 | 2 |
| 52 F | 84 | 157   | 54.3  | 22.02929 | 1.3 | 3 |
| 53 F | 80 | 138.4 | 42.5  | 22.18793 | 2.3 | 3 |
| 54 F | 86 | 139.1 | 61.8  | 31.93995 | 2.7 | 3 |
| 55 F | 85 | 143.5 | 70.2  | 34.0905  | 2.4 | 2 |
| 56 M | 65 | 165   | 104.4 | 38.34711 | 2.3 | 3 |
| 57 F | 81 | 146   | 37    | 17.35785 | 2.8 | 2 |
| 58 M | 80 | 162.2 | 80.6  | 30.63609 | 4.3 | 2 |
| 59 M | 84 | 167.5 | 66.4  | 23.66674 | 3.3 | 3 |
| 60 F | 63 | 160.5 | 60.5  | 23.4858  | 3.6 | 2 |
| 61 F | 96 | 147.1 | 62.1  | 28.69897 | 3.5 | 2 |
| 62 F | 52 | 157   | 42.7  | 17.32322 | 4.6 | 2 |
| 63 M | 79 | 157.7 | 53.4  | 21.47227 | 4   | 3 |
| 64 M | 88 | 161.3 | 50.1  | 19.25613 | 2.6 | 3 |
| 65 F | 85 | 139.6 | 43.8  | 22.47518 | 2.5 | 2 |

| Duration of surgery | Duration of anesthesia | Dose of remimazolam | Administration of flumazenil,1 | Time to extubation | remimazolam concentration at the end of infusion | remimazolam concentration at the time of extubation | Difference of concentration |
|---------------------|------------------------|---------------------|--------------------------------|--------------------|--------------------------------------------------|-----------------------------------------------------|-----------------------------|
| 167                 | 206                    | 99.58               | 0                              | 0                  | 2 0.315003                                       | 0.202248                                            | 0.112755                    |
| 264                 | 302                    | 70.98               | 0                              | 0                  | 3 0.259177                                       | 0.199029                                            | 0.060148                    |
| 32                  | 64                     | 18.47               | 0                              | 0                  | 3 0.359482                                       | 0.222646                                            | 0.136836                    |
| 252                 | 337                    | 110                 | 0                              | 0                  | 4 0.172744                                       | 0.096526                                            | 0.076218                    |
| 169                 | 198                    | 126.18              | 0                              | 0                  | 5 0.569181                                       | 0.35205                                             | 0.217131                    |
| 219                 | 281                    | 147.1               | 0                              | 0                  | 5 0.278931                                       | 0.134465                                            | 0.144466                    |
| 44                  | 81                     | 42.28               | 0                              | 0                  | 5 0.360073                                       | 0.264337                                            | 0.095736                    |
| 58                  | 94                     | 32.22               | 0                              | 0                  | 6 0.220775                                       | 0.132276                                            | 0.088499                    |
| 68                  | 106                    | 36.3                | 0                              | 0                  | 6 0.23387                                        | 0.145035                                            | 0.088834                    |
| 339                 | 380                    | 147.53              | 0                              | 0                  | 6 0.470592                                       | 0.299996                                            | 0.170596                    |
| 367                 | 438                    | 109.95              | 0                              | 0                  | 7 0.211498                                       | 0.130809                                            | 0.080688                    |
| 142                 | 203                    | 239.62              | 0                              | 0                  | 7 0.451819                                       | 0.146347                                            | 0.305472                    |
| 95                  | 128                    | 92.08               | 0                              | 0                  | 7 0.645578                                       | 0.345154                                            | 0.300423                    |
| 111                 | 139                    | 49.67               | 0                              | 0                  | 7 0.240857                                       | 0.158714                                            | 0.082143                    |
| 117                 | 154                    | 182.55              | 0                              | 0                  | 7 0.585728                                       | 0.41412                                             | 0.171608                    |
| 103                 | 136                    | 40.4                | 0                              | 0                  | 8 0.181156                                       | 0.094622                                            | 0.086534                    |
| 174                 | 232                    | 79.75               | 0                              | 0                  | 8 0.218705                                       | 0.104424                                            | 0.114281                    |
| 97                  | 177                    | 42.08               | 0                              | 0                  | 8 0.149039                                       | 0.094372                                            | 0.054667                    |
| 149                 | 188                    | 133.13              | 0                              | 0                  | 9 0.538274                                       | 0.277291                                            | 0.260983                    |
| 163                 | 213                    | 92.87               | 0                              | 0                  | 9 0.35968                                        | 0.198689                                            | 0.160991                    |
| 93                  | 157                    | 69.08               | 0                              | 0                  | 9 0.335849                                       | 0.160981                                            | 0.174868                    |
| 162                 | 247                    | 59.14               | 0                              | 0                  | 10 0.153047                                      | 0.101228                                            | 0.051818                    |
| 122                 | 156                    | 66.05               | 0                              | 0                  | 10 0.390651                                      | 0.210555                                            | 0.180096                    |
| 250                 | 293                    | 98.1                | 0                              | 0                  | 10 0.255764                                      | 0.12284                                             | 0.132924                    |
| 92                  | 152                    | 27.08               | 0                              | 0                  | 10 0.216762                                      | 0.125899                                            | 0.090862                    |
| 96                  | 138                    | 52.8                | 0                              | 0                  | 11 0.354538                                      | 0.156869                                            | 0.197669                    |
| 150                 | 211                    | 81.33               | 0                              | 0                  | 11 0.242352                                      | 0.108118                                            | 0.134233                    |
| 149                 | 200                    | 88.98               | 0                              | 0                  | 11 0.215999                                      | 0.06924                                             | 0.146759                    |
| 38                  | 72                     | 21.92               | 0                              | 0                  | 11 0.306883                                      | 0.127656                                            | 0.179227                    |
| 349                 | 397                    | 249.42              | 0                              | 0                  | 12 0.819262                                      | 0.34883                                             | 0.470433                    |
| 251                 | 302                    | 92.9                | 0                              | 0                  | 12 0.288535                                      | 0.130062                                            | 0.158473                    |
| 59                  | 121                    | 51.75               | 0                              | 0                  | 13 0.2763                                        | 0.147726                                            | 0.128575                    |
| 80                  | 132                    | 56.75               | 0                              | 0                  | 13 0.155713                                      | 0.085623                                            | 0.07009                     |
| 199                 | 232                    | 55.64               | 0                              | 0                  | 14 0.245101                                      | 0.090769                                            | 0.154332                    |
| 53                  | 116                    | 78                  | 1                              | 1                  | 15 0.354973                                      | 0.170509                                            | 0.184464                    |
| 200                 | 246                    | 63.2                | 1                              | 1                  | 15 0.207213                                      | 0.084772                                            | 0.12244                     |

|     |     |        |   |    |          |          |          |
|-----|-----|--------|---|----|----------|----------|----------|
| 40  | 72  | 18.31  | 0 | 16 | 0.183381 | 0.08438  | 0.099001 |
| 260 | 348 | 156.17 | 1 | 16 | 0.301698 | 0.102735 | 0.198963 |
| 75  | 157 | 44.08  | 0 | 17 | 0.221001 | 0.07836  | 0.142642 |
| 59  | 118 | 44.61  | 0 | 17 | 0.216719 | 0.103586 | 0.113133 |
| 59  | 112 | 45.43  | 0 | 17 | 0.259144 | 0.139382 | 0.119762 |
| 233 | 331 | 185.67 | 1 | 18 | 0.347866 | 0.136174 | 0.211693 |
| 188 | 253 | 92.58  | 0 | 18 | 0.149295 | 0.070404 | 0.078891 |
| 31  | 61  | 30.42  | 0 | 19 | 0.142099 | 0.055361 | 0.086738 |
| 127 | 245 | 47.75  | 1 | 19 | 0.206303 | 0.098709 | 0.107594 |
| 295 | 348 | 191.8  | 0 | 19 | 0.303054 | 0.158979 | 0.144075 |
| 295 | 375 | 137.87 | 0 | 20 | 0.194099 | 0.067078 | 0.127021 |
| 343 | 416 | 172.05 | 0 | 20 | 0.200516 | 0.088886 | 0.111163 |
| 81  | 163 | 62.1   | 1 | 20 | 0.466247 | 0.162206 | 0.304042 |
| 151 | 207 | 233.62 | 1 | 20 | 0.276624 | 0.158353 | 0.11827  |
| 73  | 124 | 67.08  | 1 | 21 | 0.579725 | 0.174291 | 0.405434 |
| 130 | 215 | 116.57 | 1 | 21 | 0.373788 | 0.19228  | 0.181507 |
| 37  | 114 | 37.73  | 1 | 21 | 0.409399 | 0.157391 | 0.252008 |
| 37  | 132 | 46.81  | 1 | 22 | 0.353226 | 0.116431 | 0.236795 |
| 192 | 309 | 118.95 | 0 | 23 | 0.124302 | 0.056558 | 0.067744 |
| 314 | 409 | 189.33 | 0 | 23 | 0.176771 | 0.056296 | 0.120475 |
| 14  | 74  | 16.87  | 1 | 23 | 0.410582 | 0.103242 | 0.307339 |
| 118 | 169 | 110.08 | 0 | 24 | 0.290687 | 0.100482 | 0.190205 |
| 209 | 261 | 100.85 | 0 | 25 | 0.298709 | 0.100924 | 0.197785 |
| 45  | 86  | 40.4   | 0 | 26 | 0.482722 | 0.111248 | 0.371474 |
| 47  | 100 | 32.5   | 1 | 28 | 0.197931 | 0.070363 | 0.127568 |
| 92  | 152 | 60.3   | 1 | 31 | 0.389024 | 0.116642 | 0.272383 |
| 27  | 96  | 30.17  | 0 | 32 | 0.329661 | 0.083882 | 0.245779 |
| 320 | 390 | 109.33 | 1 | 36 | 0.235578 | 0.069311 | 0.166267 |
| 276 | 399 | 75.67  | 1 | 40 | 0.18952  | 0.051149 | 0.138371 |

| logM at the<br>end of<br>infusion | logM at the<br>time of<br>extubation | Differenc of<br>logM |
|-----------------------------------|--------------------------------------|----------------------|
| -6.27769                          | -6.47012                             | 0.192431             |
| -6.3624                           | -6.47708                             | 0.114681             |
| -6.22032                          | -6.42838                             | 0.208062             |
| -6.5386                           | -6.79136                             | 0.25276              |
| -6.02075                          | -6.2294                              | 0.208646             |
| -6.3305                           | -6.64739                             | 0.316888             |
| -6.21961                          | -6.35384                             | 0.134233             |
| -6.43205                          | -6.65452                             | 0.222469             |
| -6.40703                          | -6.61453                             | 0.207501             |
| -6.10336                          | -6.29888                             | 0.195529             |
| -6.45069                          | -6.65936                             | 0.208667             |
| -6.12104                          | -6.61062                             | 0.48958              |
| -5.96605                          | -6.23799                             | 0.271935             |
| -6.39424                          | -6.57539                             | 0.181145             |
| -6.0083                           | -6.15887                             | 0.15057              |
| -6.51795                          | -6.80001                             | 0.28206              |
| -6.43614                          | -6.7572                              | 0.321058             |
| -6.6027                           | -6.80116                             | 0.198458             |
| -6.045                            | -6.33306                             | 0.288067             |
| -6.22008                          | -6.47783                             | 0.257743             |
| -6.24986                          | -6.56922                             | 0.319369             |
| -6.59118                          | -6.7707                              | 0.179522             |
| -6.18421                          | -6.45264                             | 0.268424             |
| -6.36816                          | -6.68666                             | 0.318501             |
| -6.44002                          | -6.67598                             | 0.235959             |
| -6.22634                          | -6.58046                             | 0.354127             |
| -6.39155                          | -6.7421                              | 0.350547             |
| -6.44155                          | -6.93564                             | 0.494095             |
| -6.28903                          | -6.66996                             | 0.380932             |
| -5.86258                          | -6.23339                             | 0.37081              |
| -6.3158                           | -6.66185                             | 0.346047             |
| -6.33462                          | -6.60654                             | 0.271925             |
| -6.58368                          | -6.84341                             | 0.259733             |
| -6.38666                          | -6.81806                             | 0.431408             |
| -6.2258                           | -6.54425                             | 0.318448             |
| -6.45958                          | -6.84775                             | 0.388162             |

|          |          |          |
|----------|----------|----------|
| -6.51265 | -6.84976 | 0.337114 |
| -6.29643 | -6.76428 | 0.467856 |
| -6.43161 | -6.88191 | 0.450302 |
| -6.4401  | -6.7607  | 0.320595 |
| -6.36246 | -6.63179 | 0.269334 |
| -6.23459 | -6.64191 | 0.40732  |
| -6.60195 | -6.9284  | 0.326448 |
| -6.62341 | -7.0328  | 0.40939  |
| -6.46149 | -6.78164 | 0.320147 |
| -6.29448 | -6.57466 | 0.28018  |
| -6.48798 | -6.94942 | 0.461443 |
| -6.47385 | -6.82717 | 0.353317 |
| -6.10738 | -6.56593 | 0.45855  |
| -6.33411 | -6.57637 | 0.242262 |
| -6.01278 | -6.53473 | 0.521947 |
| -6.20338 | -6.49207 | 0.28869  |
| -6.16385 | -6.57902 | 0.415167 |
| -6.22795 | -6.70993 | 0.481983 |
| -6.68152 | -7.02351 | 0.341985 |
| -6.52859 | -7.02552 | 0.496931 |
| -6.1626  | -6.76214 | 0.599541 |
| -6.31257 | -6.77391 | 0.461336 |
| -6.30075 | -6.77201 | 0.471255 |
| -6.0923  | -6.72971 | 0.637403 |
| -6.47949 | -6.92866 | 0.44917  |
| -6.18602 | -6.70915 | 0.523123 |
| -6.25793 | -6.85233 | 0.5944   |
| -6.40386 | -6.9352  | 0.531333 |
| -6.49835 | -7.06716 | 0.568816 |
